# Supplementary material
Source: publisher site journal article supplement (http://e-cmh.org/upload/media/cmh-2021-0355-suppl3.pdf)
Supplement: Supplementary file 1 [file cmh-2021-0355-suppl3.pdf]

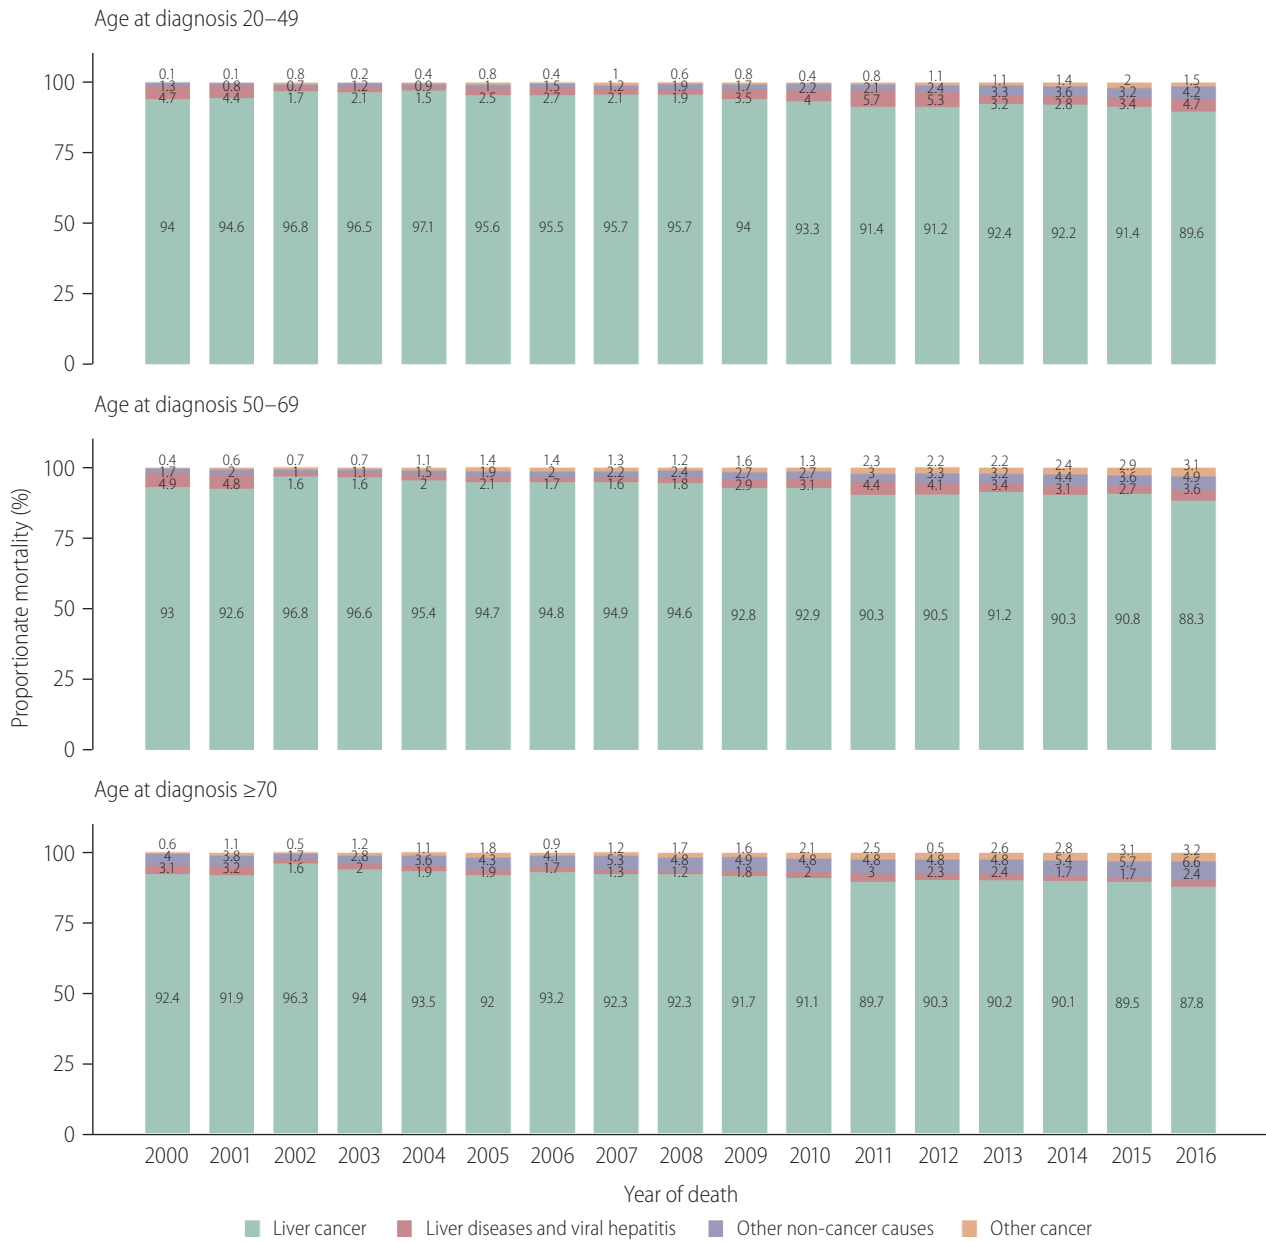

**Supplementary Figure 3.** Trends in proportionate mortality by age group, 2000–2016. Percentages are rounded to one decimal place.
